# Supplementary material
Source: publisher figshare collection journal article supplement (https://tandf.figshare.com/articles/dataset/_/22047362)
Supplement: Supplementary file 1 [file 1]

**Supplementary data for**

**Immobilization of *Trametes trogii* laccase on polyvinylpyrrolidone-coated magnetic nanoparticles for biocatalytic degradation of textile dyes**

Büşra Bakara, Emre Birhanlıb, Ahmet Ulua*, Filiz Boranb, Özfer Yeşiladab, Burhan Ateşa*

**a**Biochemistry and Biomaterials Research Laboratory, Department of Chemistry, Faculty of Arts and Science, İnönü University, 44280, Malatya, Turkey

bBiotechnology Research Laboratory, Department of Biology, Faculty of Arts and Science, İnönü University, 44280, Malatya, Turkey

Corresponding authors:

E-mail address: [ahmet.ulu@inonu.edu.tr](mailto:ahmet.ulu@inonu.edu.tr) and [burhan.ates@inonu.edu.tr](mailto:burhan.ates@inonu.edu.tr)


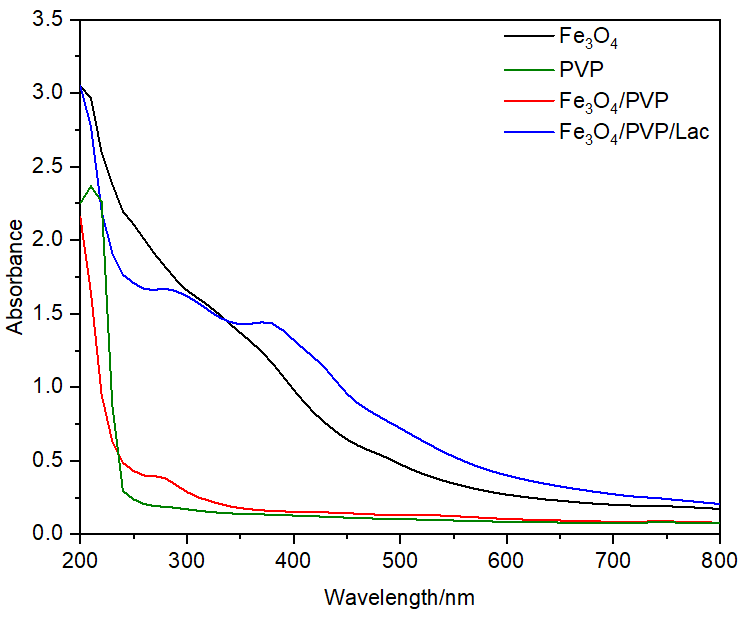


**Fig. S1.** UV-vis spectra of Fe3O4, PVP, Fe3O4/PVP, and Fe3O4/PVP/Lac.


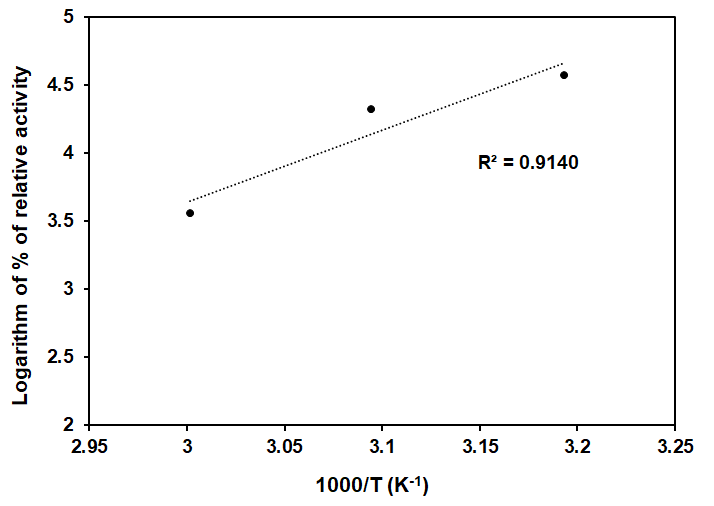


**Fig. S2.** Arrhenius plot for the Fe3O4/PVP/Lac.


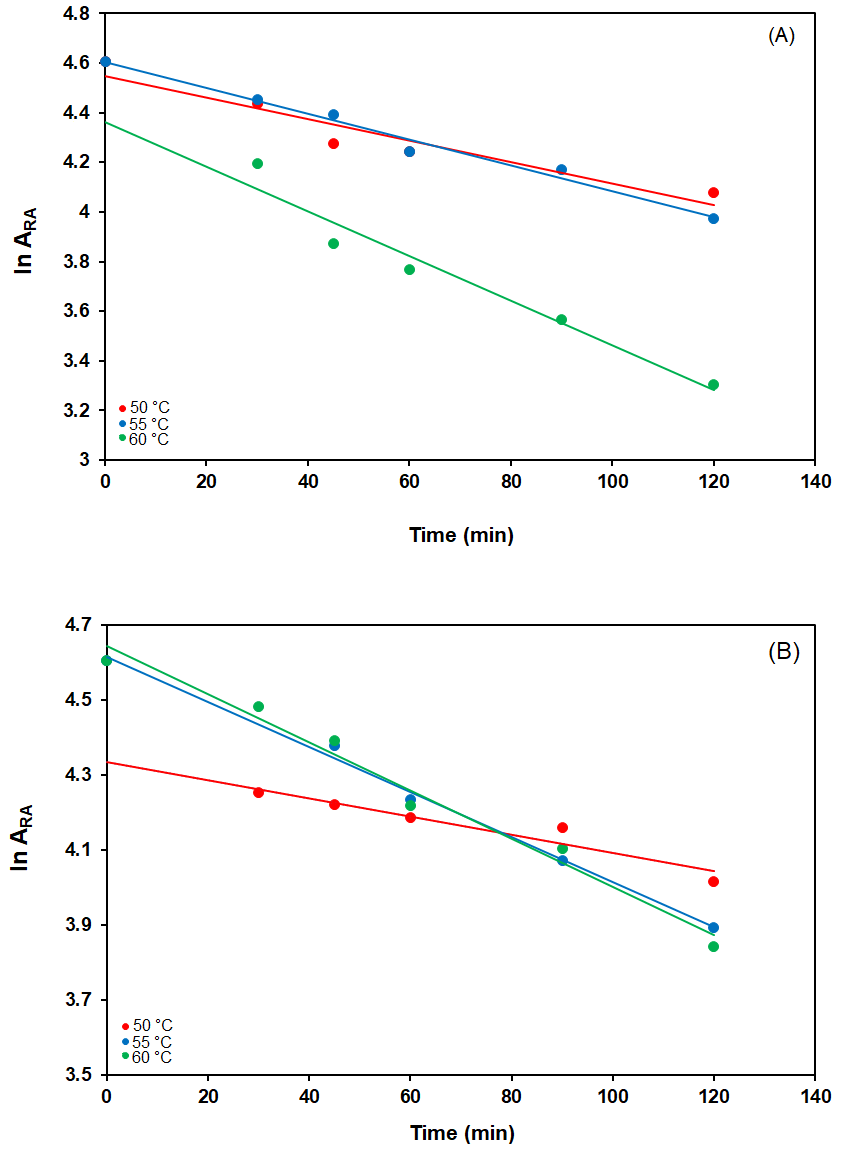


**Fig S3.** Linear relation between ln ARA and time for (A) the free Lac and (B) Fe3O4/PVP/Lac.


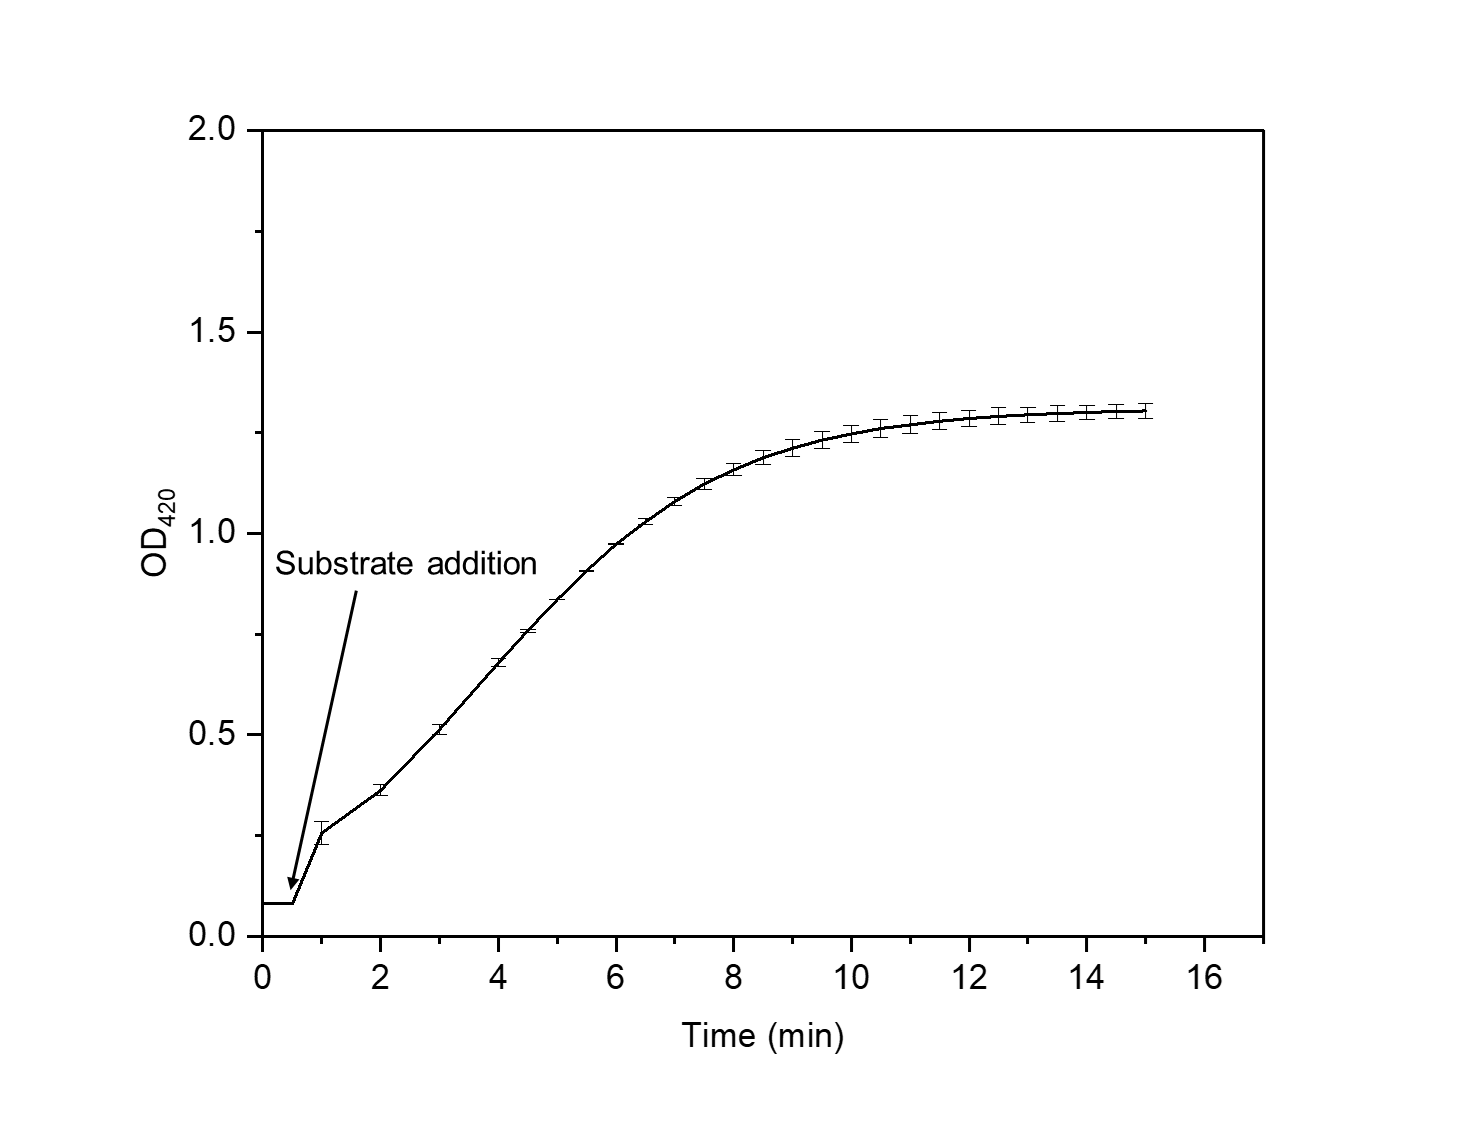


**Fig. S4.** Time course curve of laccase-catalyzed ABTS oxidation.

| A 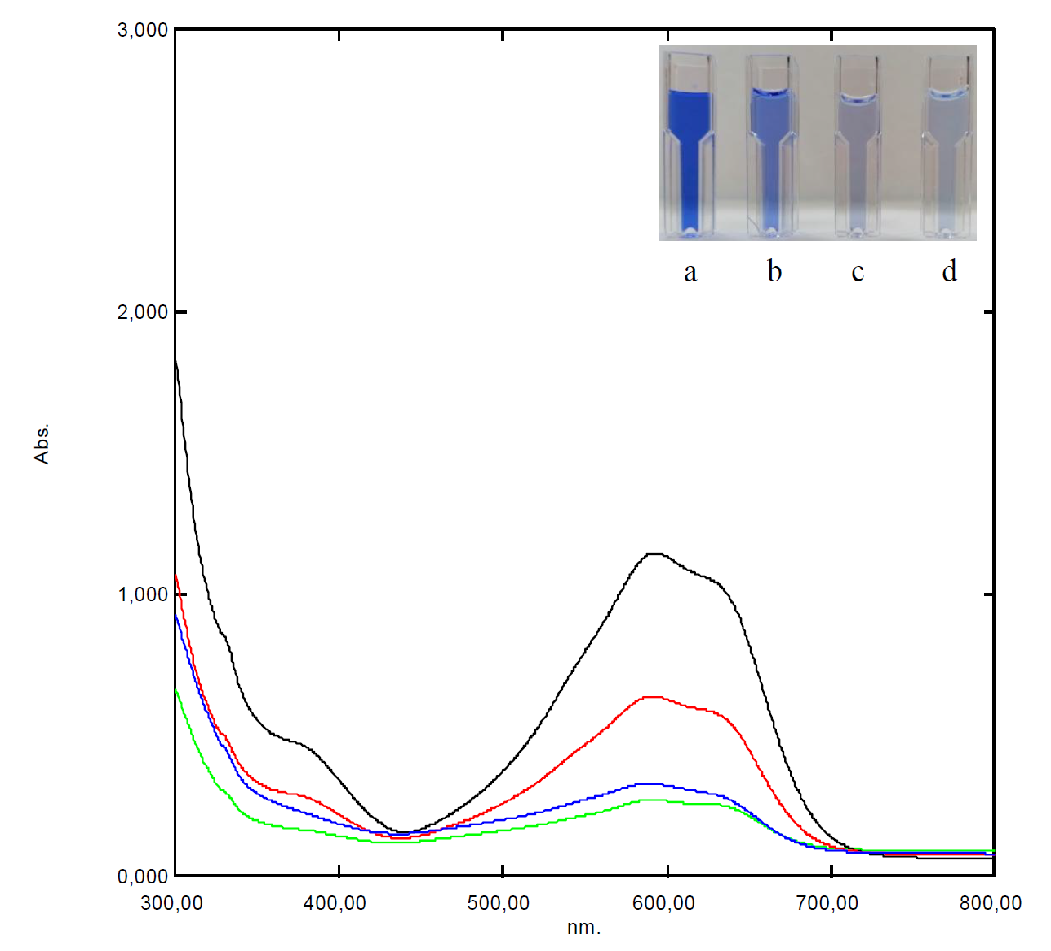 | B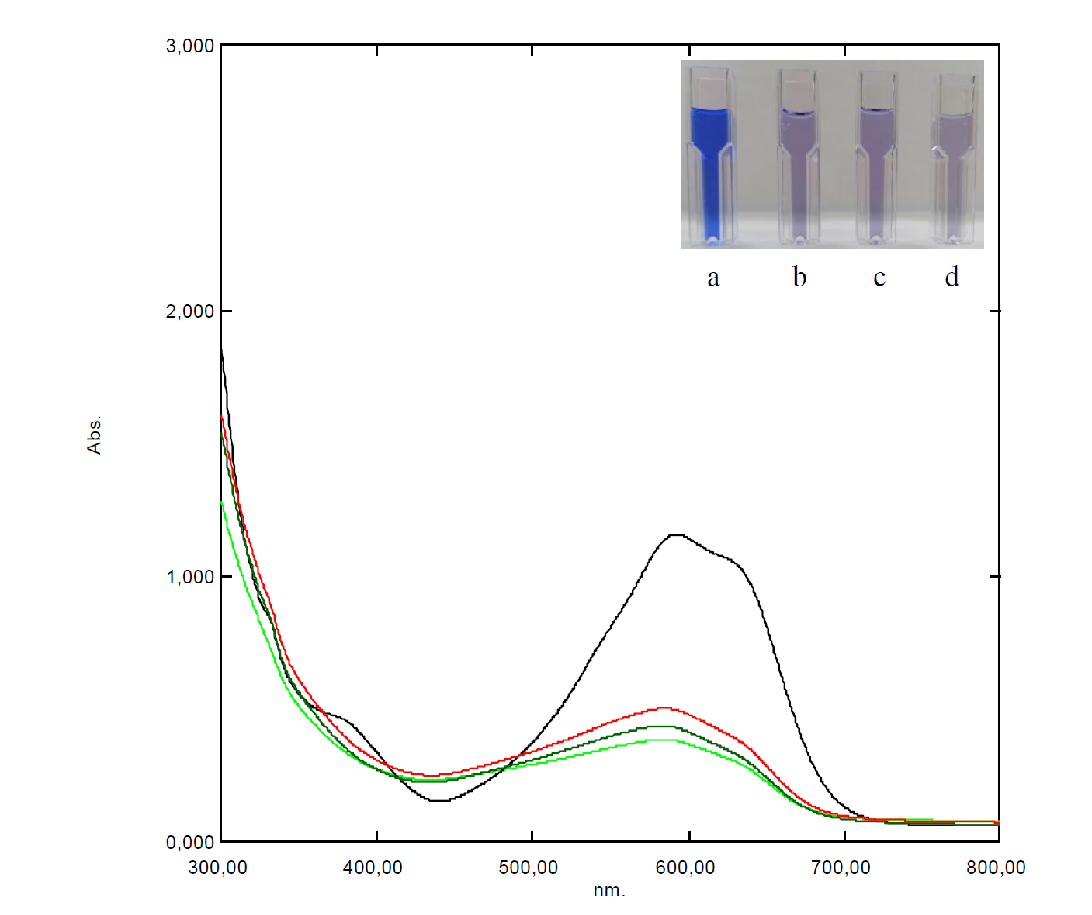 |
| --- | --- |
| C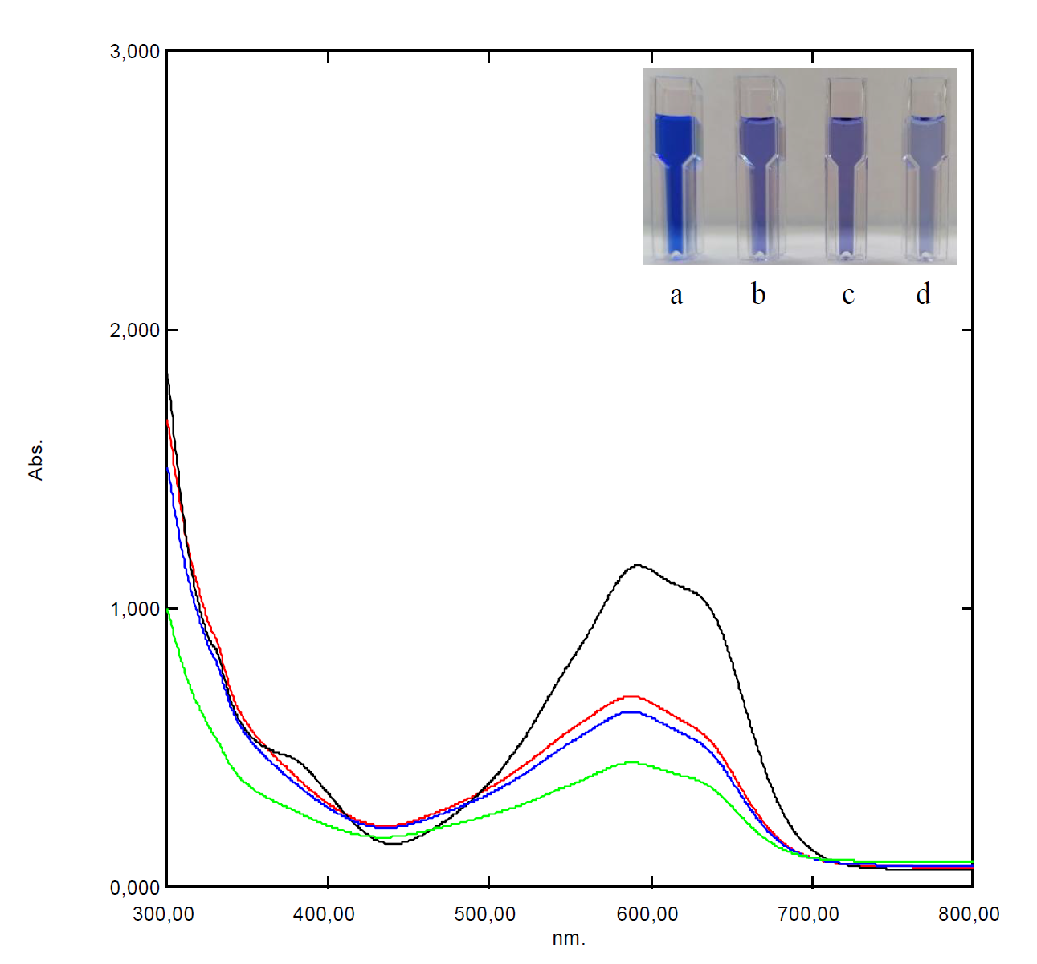 | D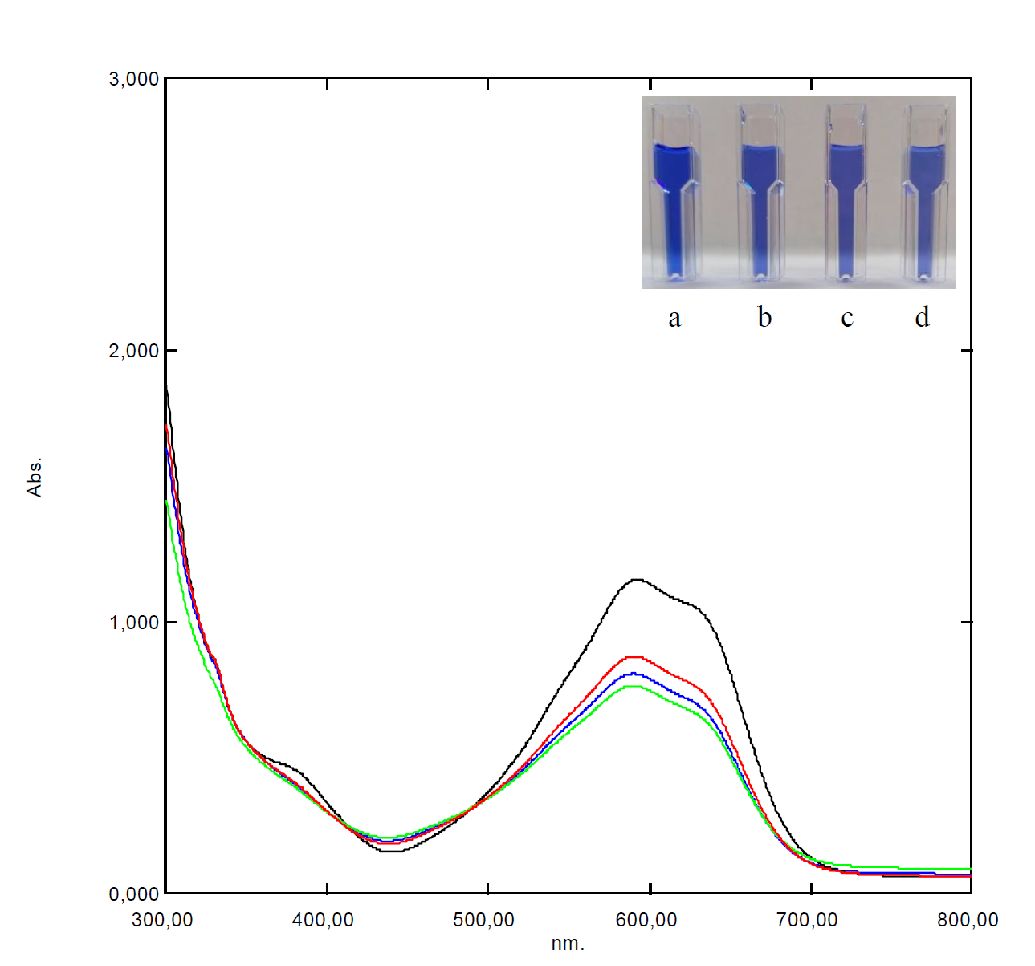 |

**Fig. S5.** The spectrophotometric scans and photographs of the color removals obtained after the incubation of RBBR at 1st cycle (A), 3th cycle (B), 6th cycle (C) and, 8th cycle (D) with Fe3O4/PVP/Lac (a: Enzymatically untreated textile dye solutions (controls), b:5 mg, c:10 mg, d:20 mg of Fe3O4/PVP/Lac). (Black line-control, Red line-5 mg of Fe3O4/PVP/Lac, Blue line-10 mg of Fe3O4/PVP/Lac, Green line-20 mg of Fe3O4/PVP/Lac).

| A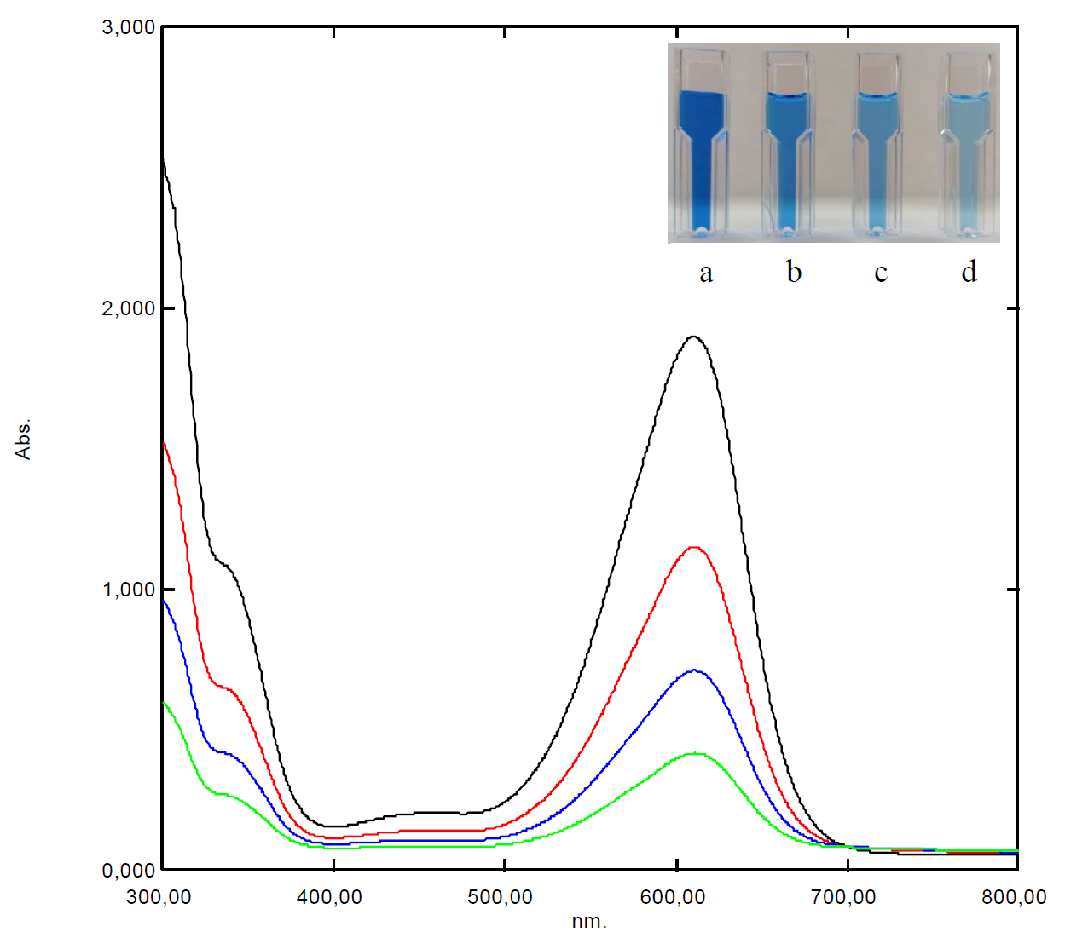 | B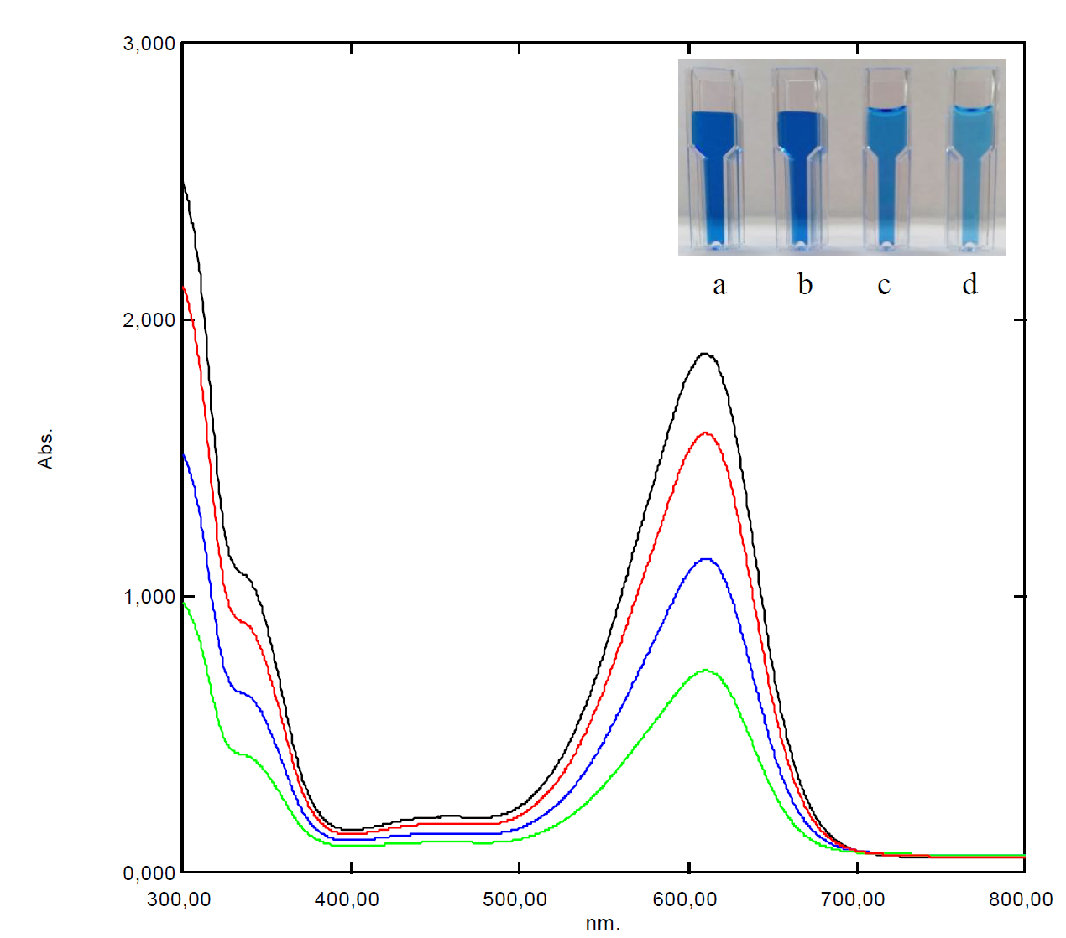 |
| --- | --- |
| 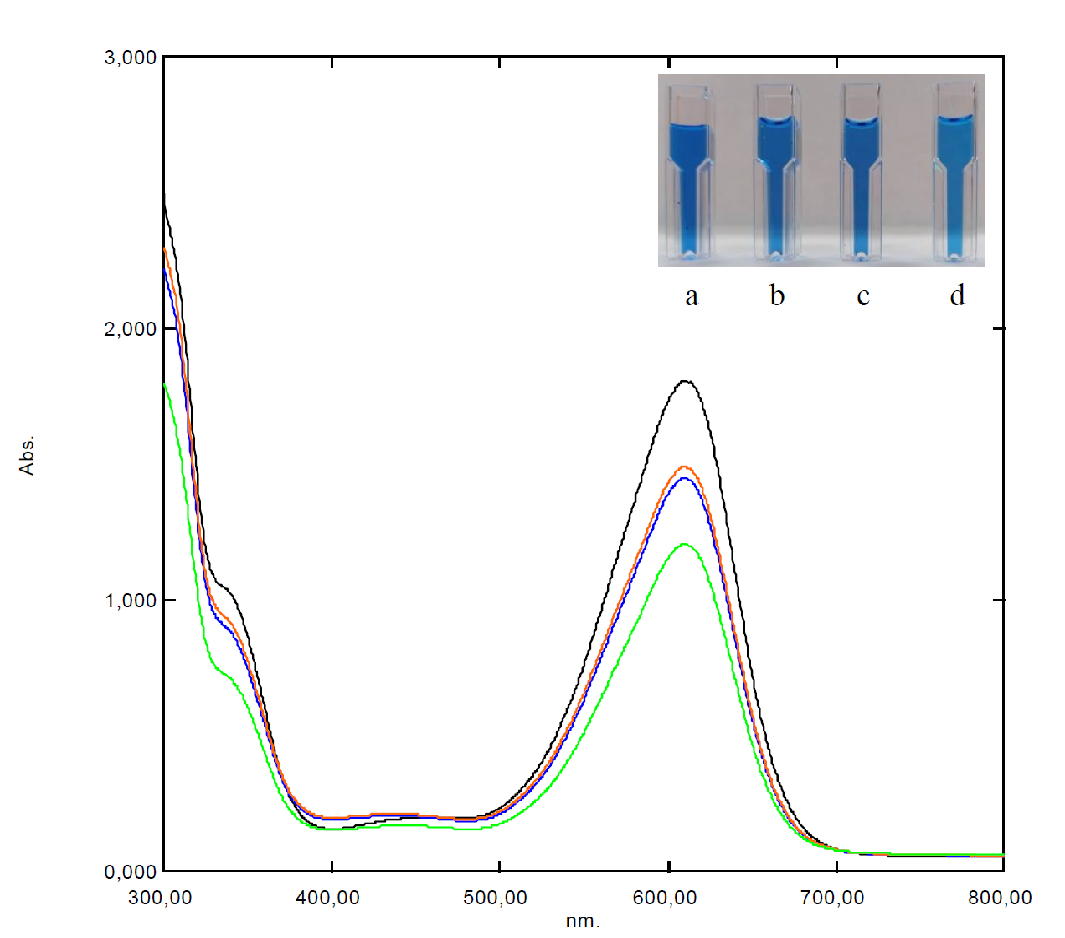  C | |

**Fig. S6.** The spectrophotometric scans and photographs of the color removals obtained after the incubation of IC at 1st cycle (A), 3th cycle (B), and, 6th cycle (C) with Fe3O4/PVP/Lac (a: Enzymatically untreated textile dye solutions (controls), b:5 mg, c:10 mg, d:20 mg of Fe3O4/PVP/Lac). (Black line-control, Red line-5 mg of Fe3O4/PVP/Lac, Blue line-10 mg of Fe3O4/PVP/Lac, Green line-20 mg of Fe3O4/PVP/Lac).
